# Supplementary material
Source: Springer Nature journal article supplement (https://www.springermedizin.de/resource/supplementary/12877_2011_744_MOESM1_ESM.pdf/9440242)

# SDAT administration and scoring process

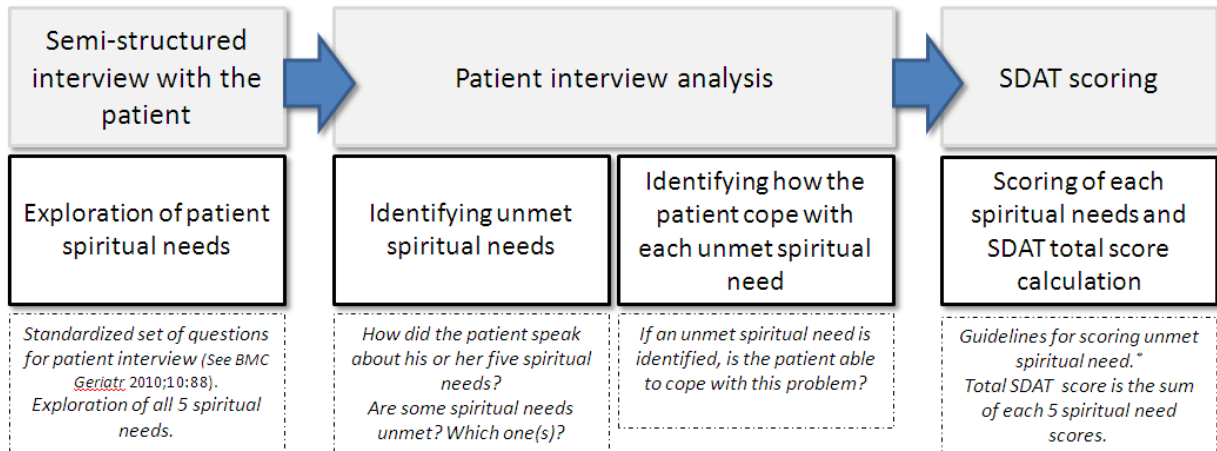

**\* Guidelines for spiritual need scoring:**

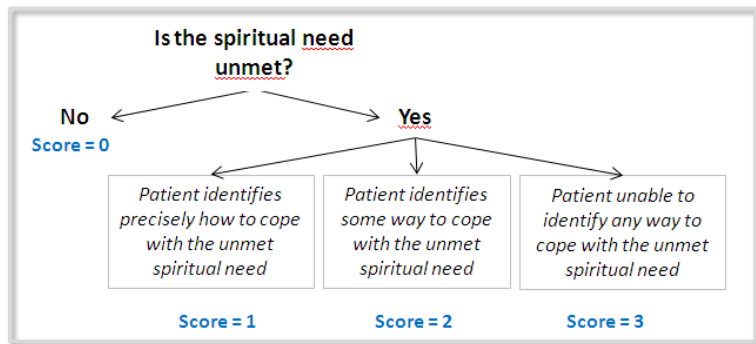

Supplement: MOESM1 [file 9440242]
